# Supplementary material
Source: PubMed Central journal article supplement (PMC9273609)
Supplement: mmc1.pdf [file mmc1.pdf]

## Supplementary Appendix

Supplement to: Mehta HB, Li S, Goodwin JS. Effectiveness of COVID-19 Booster on the Risk of Hospitalization among Medicare Beneficiaries. This appendix has been provided by the authors to give readers additional information about the work.

### Table of Contents

|                                                                                                                                                                                                                                                                                                                                                                                                                                                   |    |
|---------------------------------------------------------------------------------------------------------------------------------------------------------------------------------------------------------------------------------------------------------------------------------------------------------------------------------------------------------------------------------------------------------------------------------------------------|----|
| <b>SUPPLEMENTAL METHODS</b> .....                                                                                                                                                                                                                                                                                                                                                                                                                 | 2  |
| <b>Supplemental Figure 1.</b> Cohort derivation, target trial method. ....                                                                                                                                                                                                                                                                                                                                                                        | 9  |
| <b>Supplemental Figure 2.</b> Cohort derivation, traditional matching method. ....                                                                                                                                                                                                                                                                                                                                                                | 10 |
| <b>Supplemental Figure 3.</b> Cumulative incidence curve of COVID-19 hospitalization among individuals who received boosters vs. those who did not receive boosters, traditional matching method. ....                                                                                                                                                                                                                                            | 11 |
| <b>Supplemental Table 1.</b> Unadjusted COVID-19 hospitalization rates for boosted individuals and unboosted controls, and adjusted booster vaccine effectiveness, stratified by all individual patient characteristics. <sup>a</sup> .....                                                                                                                                                                                                       | 12 |
| <b>Supplemental Table 2.</b> Unadjusted COVID-19 hospitalization rate, adjusted hazard of hospitalization, and vaccine effectiveness for boosted enrollees vs non-boostered controls, by interval between primary vaccine and booster dose. The Target trial method was used for derivation of the cohorts. ....                                                                                                                                  | 16 |
| <b>Supplemental Table 3.</b> Characteristics of the study cohort derived using traditional matching method. ....                                                                                                                                                                                                                                                                                                                                  | 17 |
| <b>Supplemental Table 4.</b> Unadjusted COVID-19 hospitalization rates and adjusted hazards of hospitalization from a Cox proportional hazards regression model including booster and all patient characteristics: sensitivity analysis results for the study cohort derived using the traditional matching method. ....                                                                                                                          | 20 |
| <b>Supplemental Table 5.</b> Unadjusted COVID-19 hospitalization rates and adjusted hazards of hospitalization from a Cox proportional hazards regression model including booster and all patient characteristics: sensitivity analysis restricting the outcome to those with an admitting diagnosis of COVID-19 and excluding individuals with prior COVID-19 infection in the study cohort derived using target trial method. ....              | 23 |
| <b>Supplemental Table 6.</b> Unadjusted COVID-19 hospitalization rates and adjusted hazards of hospitalization from a Cox proportional hazards regression models including booster and all patient characteristics: sensitivity analysis restricting the outcome to those with an admitting diagnosis of COVID-19 and excluding individuals with prior COVID-19 infection in the study cohort derived using the traditional matching method. .... | 26 |
| <b>Supplemental Table 7.</b> Unadjusted COVID-19 hospitalization rates, adjusted hazards of hospitalization and vaccine effectiveness for booster vs non-booster, by interval between primary vaccine and booster dose in the study cohort derived using traditional matching method. ....                                                                                                                                                        | 29 |
| <b>Supplemental Table 8.</b> Association of interval between original vaccination and booster with risk of hospitalization for COVID-19: adjusted hazards ratio from a fully adjusted Cox proportional hazards regression model in the study cohort derived using the traditional matching method. ....                                                                                                                                           | 30 |

## **SUPPLEMENTAL METHODS**

### **Data source**

We used the Medicare Beneficiary Summary File for demographic and enrollment information, the Carrier File for physician claims, the Outpatient Standard Analytic File (SAF) for outpatient claims, the Hospital SAF for hospitalization, skilled nursing facility (SNF) SAF, and the Minimum Data Set. More details on these files can be found at Research Data Assistance Center.<sup>1</sup>

### **Target trial approach**

We emulated a target trial of COVID-19 booster for the prevention of COVID-19 hospitalization.<sup>2,3,4</sup> We designed a hypothetical trial and emulated using Medicare claims data. Use of target trial clearly specifies inclusion/exclusion criteria and defines intervention and outcome. Thus, it reduces the risk of selection bias, immortal time bias, clearly assigns time zero and avoids common methodological pitfalls of observational studies.<sup>5,6,7</sup> In observational studies of comparing booster to no booster, it is straightforward to assign time zero booster group – the day they receive a booster. However, there are multiple time points when individuals become eligible to be assigned to no booster group. We emulated target trial each week and assigned eligible individuals to booster vs. no booster treatment strategy each week. This helped us clearly assign time zero to non-boosted people and avoided possibility of introducing immortal time bias.<sup>2</sup> In contrast to a traditional matching where we use future information (after time zero) to identify and match individual who receive booster to those who do not receive boosters, the target trial approach avoids using future information and adheres to the principles of hypothetical randomized trial emulation. By matching individuals on the type and date of original

vaccination, and other demographic and clinical characteristics, we explicitly controlled for confounding and selection bias due to these factors. We additionally controlled confounding by controlling for all demographic and clinical characteristics. However, by design, the target trial cannot control for selection bias and confounding if important variables are not measured and controlled in the analysis.<sup>8</sup>

We first specified the target trial protocol (**Table**). We emulated target trial each week. First, we included individuals who met the *eligibility criteria*. We included Medicare beneficiaries who received two doses of Pfizer or two doses of Moderna as the primary vaccination series from 12/11/2020 through 12/31/2021. Consistent with the protocol, we included beneficiaries if the duration between the first and second dose was between 17 to 41 days. We limited the cohort to individuals who were continuously enrolled in Medicare Parts A and B with no enrollment in health maintenance organization in the year prior the *original vaccination date* and those who were residing in 50 states or District of Columbia. The *original vaccination date* was defined as the date when individuals received 2<sup>nd</sup> dose of Pfizer or Moderna. We assigned individuals to two *treatment strategies*: booster vs. no booster. For *treatment assignment*, we identified individuals who received boosters starting 8/12/2021 to 11/30/2021. All individuals who did not receive booster that week or prior were eligible to become unboosted controls. We assigned the index date of boosted individual to the matched unboosted controls. To mimic randomization, we matched one unboosted control to one boosted case based on the week and type of original vaccine, age (+/- 2 years), sex, race (Non-Hispanic White, Non-Hispanic Black, Asian, Hispanic and others), Medicaid eligibility, number of prior COVID-19 hospitalizations, prior COVID-19 infection, residence (community vs. nursing facility) and tertile of summary Elixhauser

comorbidity score (**Supplemental Figure 1**). For example, 10,656 individuals received boosters between 8/12/2021 (Thursday) and 8/15/2021 (Sunday). Of 9,207,784 individuals who did not receive boosters by 8/15/2021, we matched 10,656 unboosted controls to 10,367 boosted cases. We followed boosted cases and controls for hospitalization due to COVID-19 *outcome*. The *follow-up* started 10 days after the booster receipt. We used a 10-day lag time because it would take 7 to 10 days for boosters to build immunity.<sup>9</sup>

**Table.** Target trial protocol specification and emulation

| <b>Protocol component</b> | <b>Target trial specification</b>                                                                                                                                                                                                                                                                                                                                                                                                                                                      | <b>Target trial emulation</b>                                                                                                                                                                                                    |
|---------------------------|----------------------------------------------------------------------------------------------------------------------------------------------------------------------------------------------------------------------------------------------------------------------------------------------------------------------------------------------------------------------------------------------------------------------------------------------------------------------------------------|----------------------------------------------------------------------------------------------------------------------------------------------------------------------------------------------------------------------------------|
| Eligibility criteria      | <ul style="list-style-type: none"> <li>• Fee-for-service Medicare beneficiaries who received 2 doses of Pfizer or 2 doses of Modernavaccine between 12/11/2020 and 12/31/2021.</li> <li>• The duration between 1<sup>st</sup> and 2<sup>nd</sup> dose of the vaccine (only applicable to Pfizer and Moderna) should be between 17 and 41 days.</li> <li>• Residing in 50 states or DC</li> <li>• Individuals with at least 10 days of follow-up after the treatment receipt</li> </ul> | Same as for the target trial                                                                                                                                                                                                     |
| Treatment strategies      | <ol style="list-style-type: none"> <li>1. Receipt of Pfizer or Moderna booster 90 days after the original vaccination</li> <li>2. No receipt of booster</li> </ol>                                                                                                                                                                                                                                                                                                                     | Same as for the target trial                                                                                                                                                                                                     |
| Treatment assignment      | Random assignment of treatment strategy                                                                                                                                                                                                                                                                                                                                                                                                                                                | We attempted to emulate randomization by matching (1:1 ratio) individuals who received boosters to those who did not receive boosters by week and type of the original vaccination, and demographic and clinical characteristics |
| Outcome                   | Hospitalization due to COVID-19                                                                                                                                                                                                                                                                                                                                                                                                                                                        | Same as for the target trial                                                                                                                                                                                                     |
| Follow-up                 | For each person, follow-up starts 10 days after treatment (booster and no booster) and ends on the day of the outcome of interest, death, disenroll from fee-for-service Medicare plan or the end of the study period (December 31, 2021), or 180 days after booster whichever occurs first. We performed symmetric censoring and censored both unboosted and boosted individual of the matched pair at the same date when the unboosted individual received a booster.                | Same as for the target trial                                                                                                                                                                                                     |

| Causal contrast      | Per-protocol effect                                                                                                                                                                                                                                                                                                                                                                                                                                                                                                            | Observational analogue of per-protocol effect |
|----------------------|--------------------------------------------------------------------------------------------------------------------------------------------------------------------------------------------------------------------------------------------------------------------------------------------------------------------------------------------------------------------------------------------------------------------------------------------------------------------------------------------------------------------------------|-----------------------------------------------|
| Statistical analysis | <ul style="list-style-type: none"> <li>• Cumulative incidence curves</li> <li>• Unadjusted hospitalization rates and risk differences</li> <li>• Estimates of hazard ratio and vaccine effectiveness comparing booster group to non-booster group</li> <li>• Estimates of hazard ratio and vaccine effectiveness comparing booster group to non-booster group for different intervals between vaccination and receipt of boosters</li> <li>• Subgroup analyses by baseline demographic and clinical characteristics</li> </ul> | Same as for the target trial                  |

### Traditional matching approach

In the target trial approach, unboosted controls were censored when they received a booster. Nearly 44.39% of unboosted controls eventually received boosters and were censored. This may introduce selection bias if the reason for censoring is affected by booster receipt and shares common causes with hospitalization. To address these issues, we used a traditional matching approach as a sensitivity analysis,<sup>10</sup> where we matched boosted cases to unboosted controls based on the week and type of original vaccine, age +/- 2 years, sex, race (Non-Hispanic White, Non-Hispanic Black, Asian, Hispanic and others), Medicaid eligibility, number of prior COVID-19 hospitalizations, prior COVID-19 infection, residence (community vs. nursing facility) and tertile of summary Elixhauser comorbidity score (**Supplemental Figure 2**). Boosted group included individuals who received boosters from 8/12/2021 through 11/30/2021. Unboosted group included individuals who did not receive boosters from 8/12/2021 through 12/31/2021. Unboosted individuals were assigned the same index date as the matched boosted individual. Of 4,731,607 boosted individuals, 2,293,887 (48.5%) were matched to controls on all characteristics.

## **Covariates**

Using a previously validated approach, we identified residence (community vs. nursing facility/institution) in the 90 days before the original vaccination date.<sup>11</sup> Using all claim files, we identified if an individual had a COVID-19 diagnosis before 08/12/2021. If an individual was diagnosed with COVID-19 before April 1, 2020, we used ICD-10-CM codes of J12.89, J20.8, J40, J22 J98.8, J80 combined with B97.29, or U07.1 to identify COVID-19 diagnosis.<sup>12</sup> We used Agency for Healthcare Research and Quality's Elixhauser comorbidity index of 38 comorbidities and combined comorbidities in some analyses.<sup>13</sup> We used AHRQ weights to derive summary Elixhauser comorbidity score. We considered patients having comorbidity if they had at least one claim in Hospital SAF or SNF SAF or two claims in Outpatient SAF or Carrier File that were at least 30 days apart.<sup>14</sup>

## **Statistical analysis**

We constructed Cox proportional hazards regression models to determine the association of booster receipt with the risk of COVID-19 hospitalization, controlling for the prior vaccine and patient characteristics. All individuals were censored when they died, disenrolled from fee-for-service Medicare plan or at the end of the study period (December 31, 2021). We performed symmetric censoring and censored both the unboosted and boosted individuals of the matched pair at the same date when the unboosted individual received a booster. We estimated vaccine effectiveness as  $(1 - \text{hazard ratio}) * 100$ . We tested proportional hazard assumption in these Cox models by determining that the logarithm of the baseline cumulative hazard rates and the Schoenfeld residuals were proportional to follow-up time. The residual plots and the Supremum tests for all covariates suggested that the proportional hazard assumption was not violated.<sup>15</sup>

In the main Cox regression models, we performed an interaction of patient characteristics with a booster. For each interaction term, we created a separate Cox model while controlling for all the other patient characteristics. If the interaction term was significant, we performed stratified analyses to assess booster's effectiveness on the risk of COVID-19 hospitalization.

We used risk difference from the primary target trial cohort analysis, i.e., difference in number of individuals hospitalized among boosted vs. non-boosted individuals and multiplied with 130 to obtain risk difference over 130 days per million persons. As per the most recent CDC data, nearly 15 million people over 65 years of age are eligible to receive boosters.<sup>16</sup> We multiplied calculated risk difference with 15 to estimate how many hospitalizations will be prevented if all age 65+ unboosted individuals received COVID-19 booster.

We also used Cox regression model to estimate the risk of hospitalization for boosted cases compared to unboosted controls for different intervals between vaccination and receipt of boosters, controlling for all patient characteristics, original vaccination type and the type of booster.

### **Sensitivity analyses**

We performed all the above analyses using the target trial cohort and repeated them for the traditionally matched cohort. We addressed “hospitalized *with* COVID-19 versus hospitalized *because of* COVID-19” issue<sup>17</sup> by identifying the outcome of COVID-19 hospitalization as those with a primary admitting COVID-19 diagnosis in sensitivity analyses.

All analyses were performed with SAS Enterprise, version 7.1 (SAS Institute Inc), at the Centers for Medicare & Medicaid Services Virtual Research Data Center.



**Supplemental Figure 1.** Cohort derivation, target trial method.

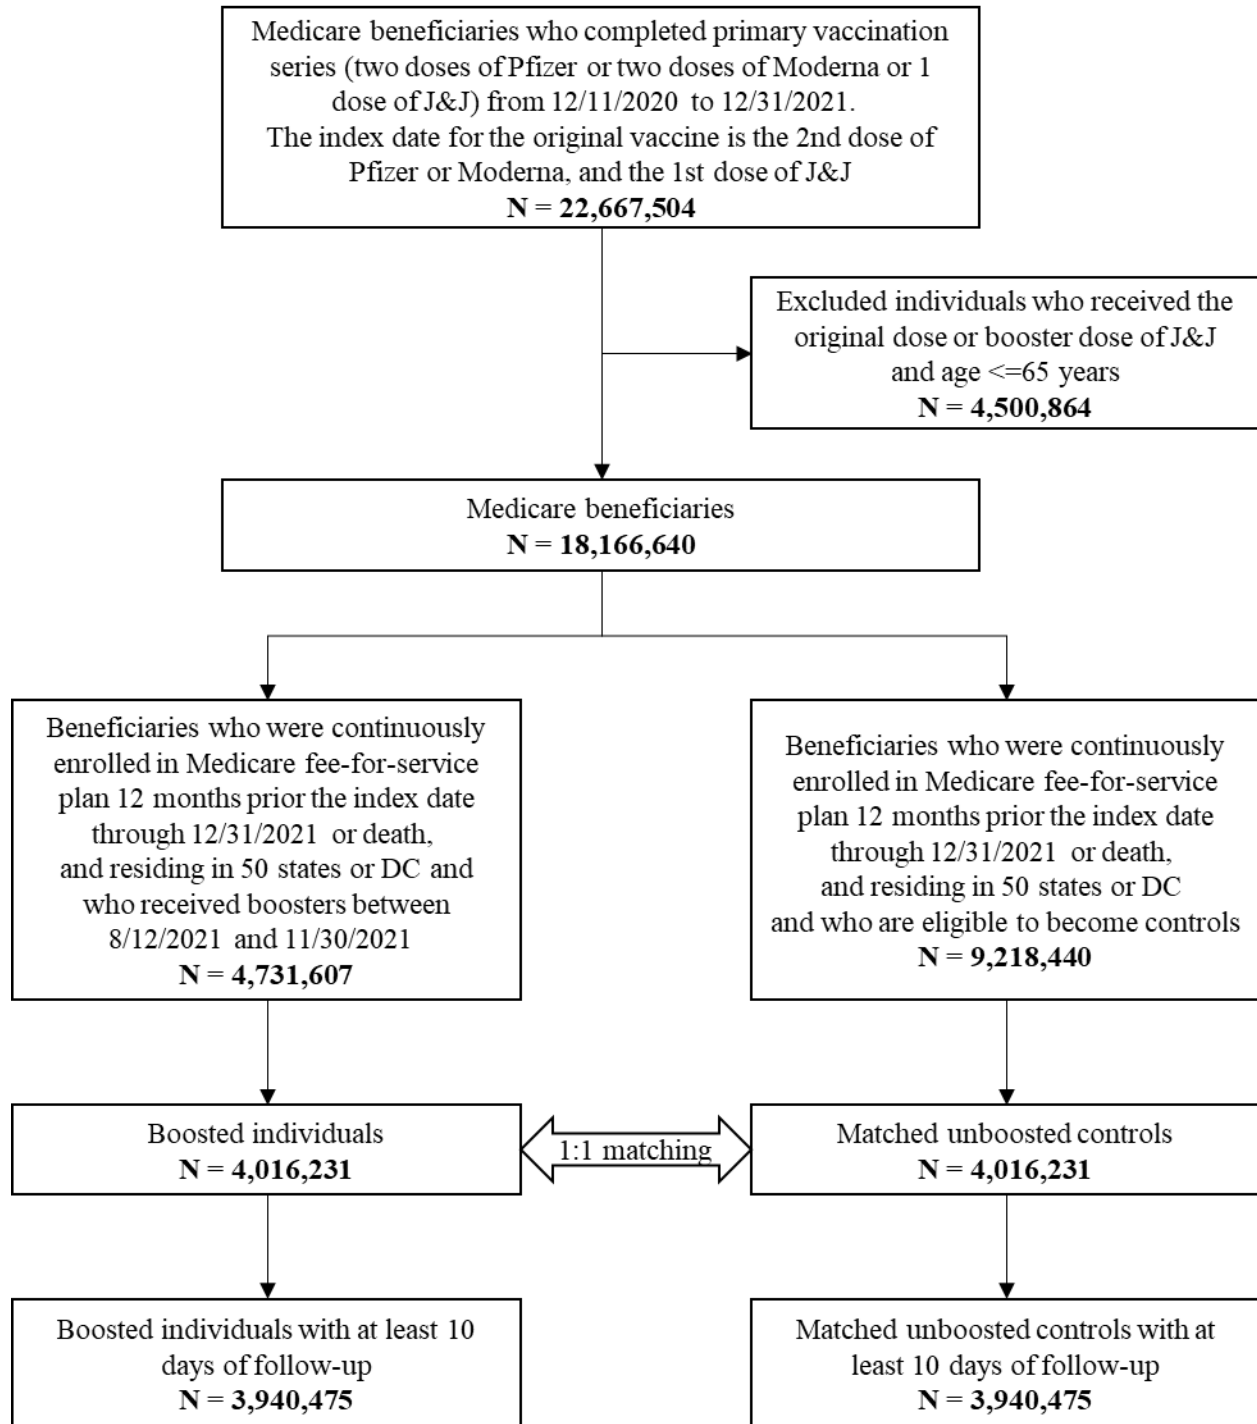

While the cohort initially included all those who completed their original vaccination by 12/31/21 after subsequent exclusions and matching, only those with an original vaccination date between 1/2/21 and 9/1/21 were studied.

**Supplemental Figure 2.** Cohort derivation, traditional matching method.

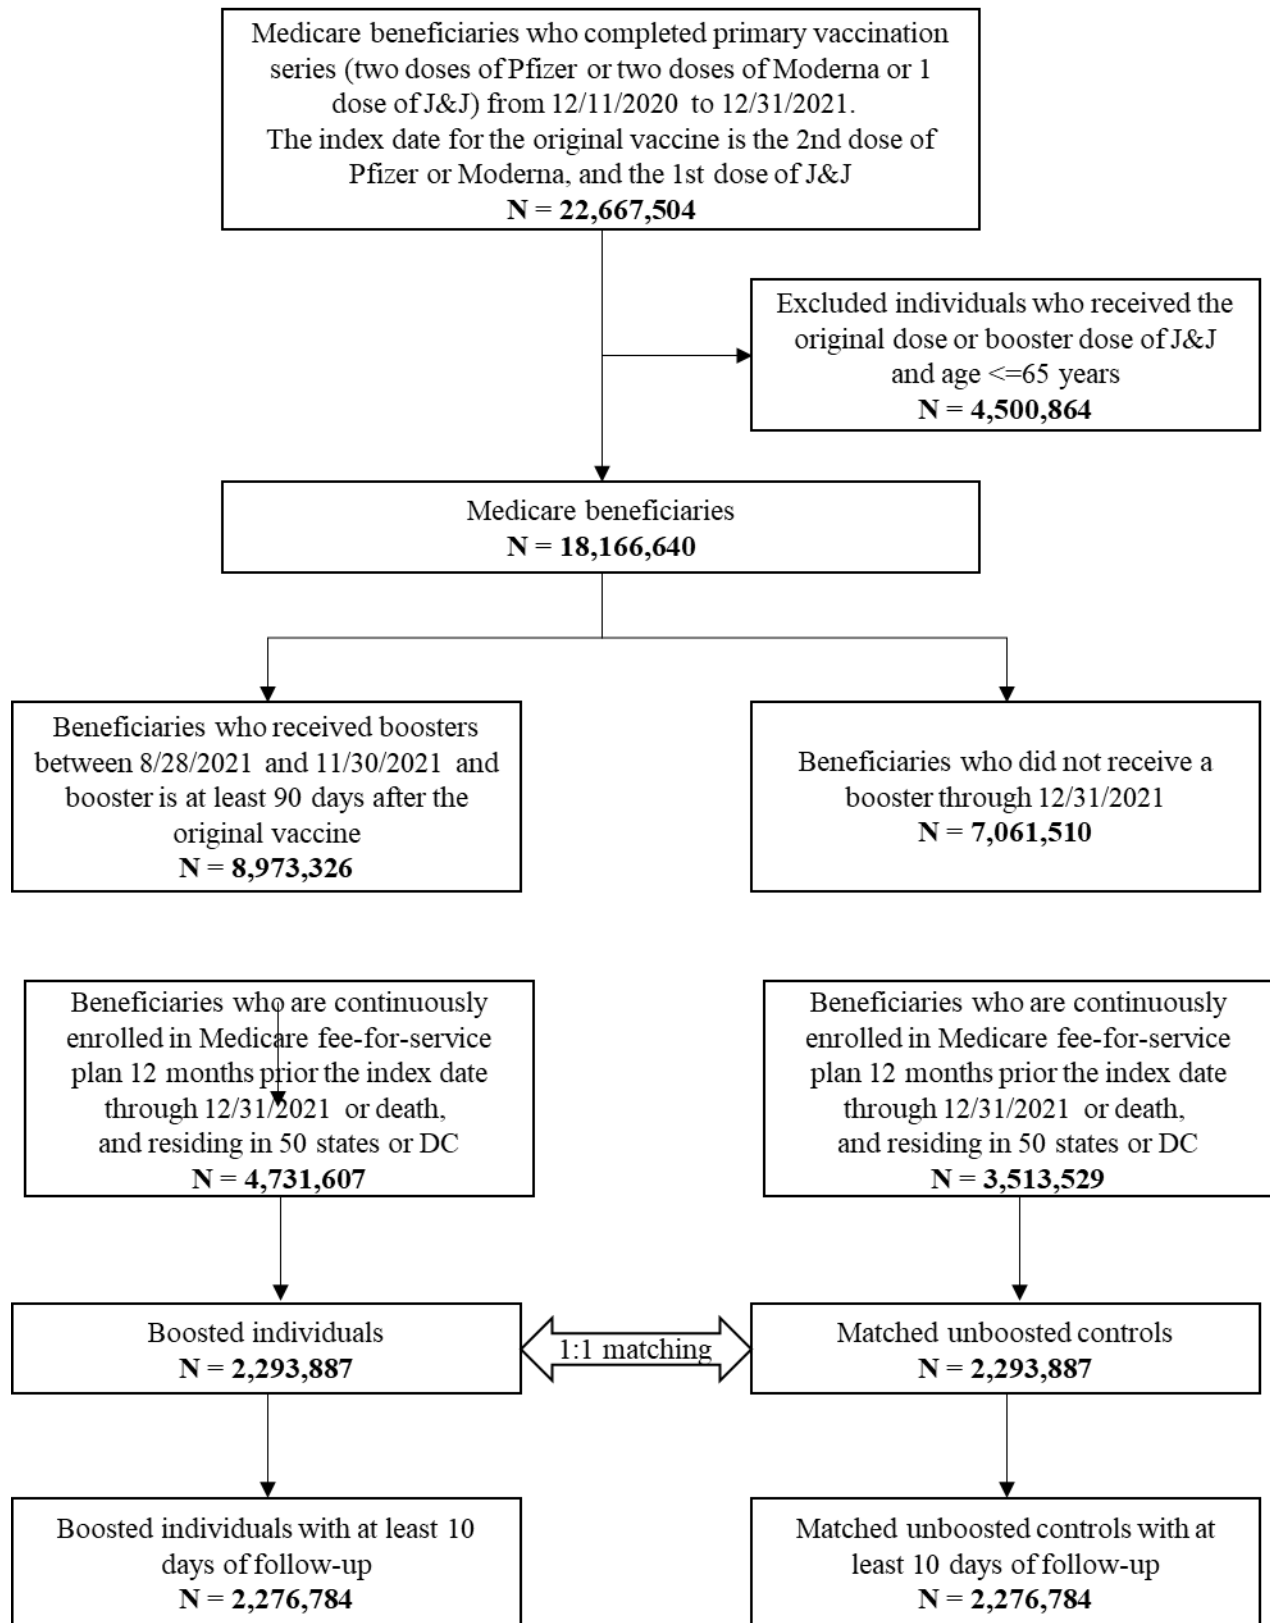

**Supplemental Figure 3.** Cumulative incidence curve of COVID-19 hospitalization among individuals who received boosters vs. those who did not receive boosters, traditional matching method. Joinpoint analyses of the curves found no significant changes in slope.

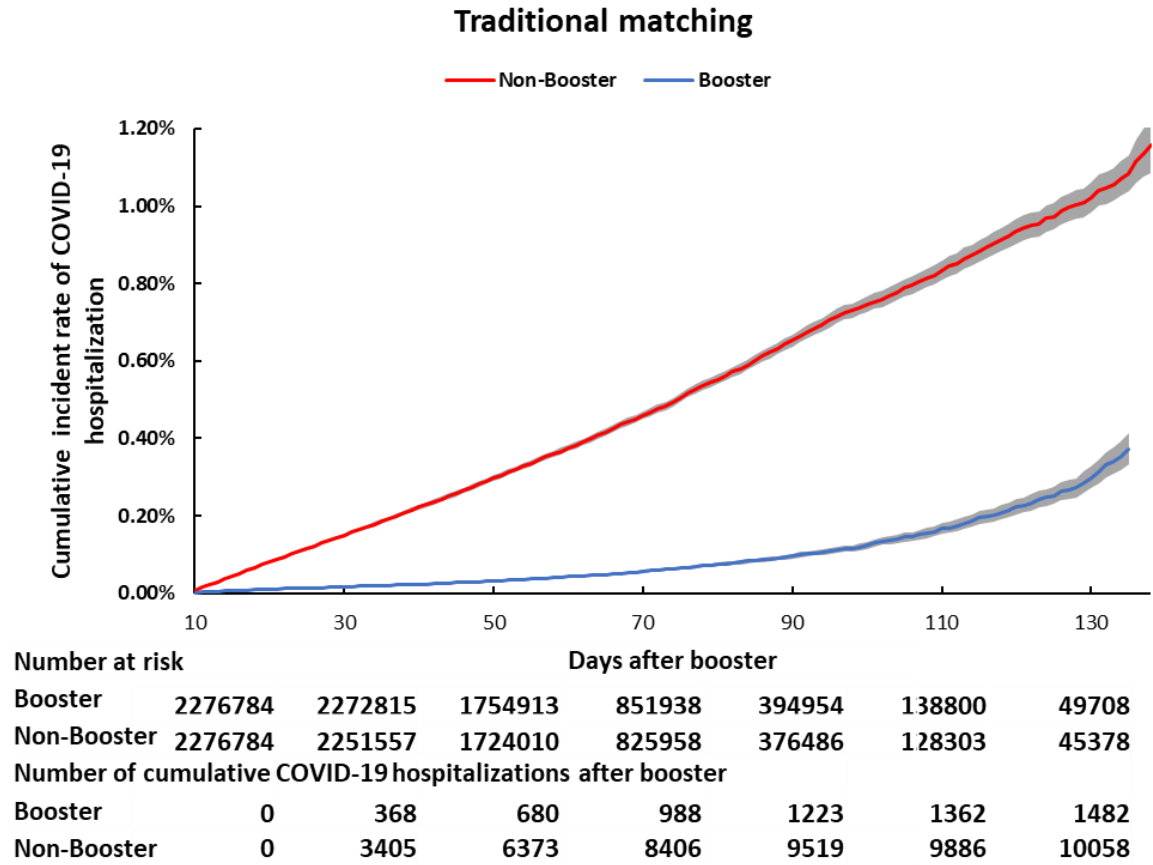

**Supplemental Table 1.** Unadjusted COVID-19 hospitalization rates for boosted individuals and unboosted controls, and adjusted booster vaccine effectiveness, stratified by all individual patient characteristics.<sup>a</sup>

|                                     | All<br>N (%)       | Hospitalization rate<br>per 1,000,000 person<br>days among boosted<br>individuals | Hospitalization rate<br>per 1,000,000 person<br>days among unboosted<br>controls | Hospitalization rate<br>difference (95% CI),<br>boosted individuals vs.<br>unboosted controls | Booster vaccine<br>effectiveness,<br>percent<br>(95% CI) <sup>b</sup> |
|-------------------------------------|--------------------|-----------------------------------------------------------------------------------|----------------------------------------------------------------------------------|-----------------------------------------------------------------------------------------------|-----------------------------------------------------------------------|
| All                                 | 7,880,950          | 8.20 (7.81, 8.60)                                                                 | 43.70 (42.79, 44.64)                                                             | 35.51 (24.50, 36.51)                                                                          | 81 (80, 82)                                                           |
| COVID-19 vaccine<br>original        |                    |                                                                                   |                                                                                  |                                                                                               |                                                                       |
| Pfizer                              | 4,035,158 (51.20%) | 9.69 (9.13, 10.29)                                                                | 50.14 (48.83, 51.47)                                                             | 40.44 (39.00, 41.88)                                                                          | 81 (79, 82)                                                           |
| Moderna                             | 3,845,792 (48.80%) | 6.30 (5.79, 6.84)                                                                 | 35.56 (34.33, 36.83)                                                             | 29.26 (27.91, 30.62)                                                                          | 82 (81, 83)                                                           |
| Age                                 |                    |                                                                                   |                                                                                  |                                                                                               |                                                                       |
| 66-70                               | 2,248,536 (28.53%) | 4.89 (4.35, 5.50)                                                                 | 22.27 (21.06, 23.55)                                                             | 17.38 (16.01, 18.75)                                                                          | 79 (76, 81)                                                           |
| 71-75                               | 2,169,531 (27.53%) | 6.21 (5.59, 6.91)                                                                 | 32.83 (31.35, 34.39)                                                             | 26.62 (24.96, 28.27)                                                                          | 81 (79, 83)                                                           |
| 76-80                               | 1,526,810 (19.37%) | 8.36 (7.50, 9.33)                                                                 | 50.42 (48.24, 52.70)                                                             | 42.06 (39.65, 44.47)                                                                          | 83 (81, 85)                                                           |
| 81-85                               | 1,006,481 (12.77%) | 12.38 (11.07, 13.83)                                                              | 65.49 (62.43, 68.71)                                                             | 53.11 (49.69, 56.54)                                                                          | 81 (79, 83)                                                           |
| 86+                                 | 929,592 (11.80%)   | 16.22 (14.66, 17.95)                                                              | 84.50 (80.86, 88.30)                                                             | 68.28 (64.21, 72.35)                                                                          | 81 (79, 83)                                                           |
| Race                                |                    |                                                                                   |                                                                                  |                                                                                               |                                                                       |
| Non-Hispanic<br>White               | 6,807,760 (86.38%) | 8.21 (7.80, 8.65)                                                                 | 45.37 (44.37, 46.40)                                                             | 37.16 (36.06, 38.26)                                                                          | 82 (81, 83)                                                           |
| Non-Hispanic<br>Black               | 337,824 (4.29%)    | 10.94 (8.92, 13.41)                                                               | 44.39 (40.12, 49.11)                                                             | 33.45 (28.44, 38.46)                                                                          | 76 (70, 81)                                                           |
| Asian                               | 225,590 (2.86%)    | 3.96 (2.61, 6.02)                                                                 | 17.71 (14.53, 21.59)                                                             | 13.75 (9.87, 17.63)                                                                           | 79 (66, 87)                                                           |
| Hispanic                            | 218,912 (2.78%)    | 10.80 (8.40, 13.88)                                                               | 37.31 (32.59, 42.71)                                                             | 26.51 (20.78, 32.24)                                                                          | 72 (63, 79)                                                           |
| Other                               | 290,864 (3.69%)    | 5.82 (4.31, 7.85)                                                                 | 28.65 (25.03, 32.79)                                                             | 22.83 (18.59, 27.07)                                                                          | 80 (72, 85)                                                           |
| Medicaid eligibility                |                    |                                                                                   |                                                                                  |                                                                                               |                                                                       |
| No                                  | 7,388,256 (93.75%) | 7.66 (7.28, 8.07)                                                                 | 42.18 (41.25, 43.12)                                                             | 34.52 (33.50, 35.53)                                                                          | 82 (81, 83)                                                           |
| Yes                                 | 492,694 (6.25%)    | 16.03 (13.97, 18.40)                                                              | 66.16 (61.81, 70.81)                                                             | 50.12 (45.12, 55.13)                                                                          | 76 (72, 79)                                                           |
| Number of prior<br>hospitalizations |                    |                                                                                   |                                                                                  |                                                                                               |                                                                       |
| 0                                   | 6,986,464 (88.65%) | 6.05 (5.70, 6.43)                                                                 | 36.43 (35.54, 37.34)                                                             | 30.38 (29.41, 31.35)                                                                          | 83 (82, 84)                                                           |
| 1                                   | 675,388 (8.57%)    | 19.39 (17.44, 21.56)                                                              | 82.57 (78.41, 86.94)                                                             | 63.18 (58.45, 67.91)                                                                          | 76 (73, 79)                                                           |
| 2 and above                         | 219,098 (2.78%)    | 38.34 (33.66, 43.66)                                                              | 144.92 (135.46,<br>155.03)                                                       | 106.60 (95.61, 117.60)                                                                        | 73 (69, 77)                                                           |
| Prior COVID-19                      |                    |                                                                                   |                                                                                  |                                                                                               |                                                                       |
| No                                  | 7,398,502 (93.88%) | 8.07 (7.67, 8.49)                                                                 | 44.64 (43.96, 33.02)                                                             | 36.57 (35.53, 37.62)                                                                          | 82 (81, 83)                                                           |

|                                           |                    |                      |                         |                      |             |
|-------------------------------------------|--------------------|----------------------|-------------------------|----------------------|-------------|
| Yes                                       | 482,448 (6.12%)    | 10.07 (8.46, 11.98)  | 29.84 (26.96, 33.02)    | 19.77 (16.28, 23.27) | 67 (60, 73) |
| Residence prior to original vaccination   |                    |                      |                         |                      |             |
| Community                                 | 7,754,612 (98.40%) | 8.03 (7.64, 8.44)    | 43.66 (42.74, 44.60)    | 35.63 (34.62, 36.64) | 82 (81, 82) |
| Nursing facility                          | 126,338 (1.60%)    | 17.59 (13.68, 22.60) | 45.99 (39.36, 53.76)    | 28.41 (19.99, 36.83) | 62 (49, 72) |
| Comorbidity status                        |                    |                      |                         |                      |             |
| Deficiency anemia                         |                    |                      |                         |                      |             |
| No                                        | 7,052,259 (89.48%) | 6.23 (5.87, 6.61)    | 36.91 (36.03, 37.82)    | 30.68 (29.71, 31.65) | 83 (82, 84) |
| Yes                                       | 828,691 (10.52%)   | 24.20 (22.22, 26.36) | 99.59 (95.45, 103.91)   | 75.39 (70.68, 80.10) | 76 (74, 78) |
| Auto immune                               |                    |                      |                         |                      |             |
| No                                        | 7,560,335 (95.93%) | 7.49 (7.11, 7.89)    | 42.21 (41.30, 43.14)    | 34.72 (33.71, 35.72) | 82 (81, 83) |
| Yes                                       | 320,615 (4.07%)    | 21.93 (19.17, 25.09) | 81.16 (74.99, 87.83)    | 59.23 (52.17, 66.29) | 73 (68, 77) |
| Leukemia                                  |                    |                      |                         |                      |             |
| No                                        | 7,830,656 (99.36%) | 7.72 (7.34, 8.11)    | 43.17 (42.26, 44.10)    | 35.45 (36.45, 34.46) | 82 (81, 83) |
| Yes                                       | 50,294 (0.64%)     | 62.29 (51.63, 75.15) | 137.21 (117.16, 160.68) | 74.92 (50.30, 99.54) | 57 (44, 66) |
| Lymphoma                                  |                    |                      |                         |                      |             |
| No                                        | 7,796,030 (98.92%) | 7.60 (7.23, 8.00)    | 53.24 (42.33, 44.17)    | 35.64 (34.64, 36.64) | 82 (81, 83) |
| Yes                                       | 84,920 (1.08%)     | 48.48 (41.08, 57.22) | 90.81 (78.27, 105.35)   | 42.32 (26.62, 58.02) | 50 (37, 60) |
| Metastatic cancer                         |                    |                      |                         |                      |             |
| No                                        | 7,794,663 (98.91%) | 7.99 (7.60, 8.40)    | 43.34 (42.43, 44.27)    | 35.35 (34.35, 36.35) | 81 (80, 82) |
| Yes                                       | 86,287 (1.09%)     | 22.49 (17.57, 28.79) | 77.80 (66.69, 90.75)    | 55.31 (42.10, 68.51) | 73 (63, 79) |
| Solid tumor without metastasis, malignant |                    |                      |                         |                      |             |
| No                                        | 7,237,444 (91.83%) | 7.81 (7.41, 8.23)    | 42.72 (41.78, 43.68)    | 34.91 (33.88, 35.94) | 82 (80, 83) |
| Yes                                       | 643,506 (8.17%)    | 12.09 (10.58, 13.82) | 55.05 (51.51, 58.84)    | 42.96 (38.95, 46.96) | 79 (75, 82) |
| Solid tumor without metastasis, in situ   |                    |                      |                         |                      |             |
| No                                        | 7,815,409 (99.17%) | 8.13 (7.74, 8.54)    | 43.61 (42.70, 44.55)    | 35.48 (34.48, 36.49) | 82 (80, 83) |
| Yes                                       | 65,541 (0.83%)     | 15.44 (10.66, 22.36) | 55.49 (44.86, 68.63)    | 40.05 (26.94, 53.16) | 72 (58, 82) |

|                                   |                    |                      |                         |                        |             |
|-----------------------------------|--------------------|----------------------|-------------------------|------------------------|-------------|
| Congestive heart failure          |                    |                      |                         |                        |             |
| No                                | 7,338,605 (93.12%) | 6.83 (6.47, 7.22)    | 36.88 (36.01, 37.77)    | 30.05 (29.09, 31.00)   | 82 (80, 83) |
| Yes                               | 542,345 (6.88%)    | 26.94 (24.31, 29.86) | 128.50 (122.83, 134.42) | 101.60 (95.13, 108.01) | 79 (77, 81) |
| Coagulopathy                      |                    |                      |                         |                        |             |
| No                                | 7,697,984 (97.68%) | 7.53 (7.16, 7.93)    | 42.15 (41.25, 43.08)    | 34.62 (33.63, 35.61)   | 82 (81, 83) |
| Yes                               | 182,966 (2.32%)    | 32.97 (28.38, 38.30) | 108.98 (99.83, 118.96)  | 76.01 (65.25, 86.76)   | 71 (66, 76) |
| Dementia                          |                    |                      |                         |                        |             |
| No                                | 7,496,063 (95.12%) | 7.55 (7.17, 7.95)    | 40.79 (39.88, 41.72)    | 33.24 (32.24, 34.24)   | 82 (81, 83) |
| Yes                               | 384,887 (4.88%)    | 22.81 (19.81, 26.27) | 89.41 (84.19, 94.96)    | 66.60 (60.33, 72.87)   | 73 (68, 77) |
| Depression                        |                    |                      |                         |                        |             |
| No                                | 7,173,168 (91.02%) | 7.46 (7.08, 7.87)    | 40.57 (39.65, 41.52)    | 33.11 (32.09, 34.12)   | 82 (81, 83) |
| Yes                               | 707,782 (8.98%)    | 15.74 (13.99, 17.70) | 72.97 (69.24, 76.90)    | 57.23 (52.98, 61.49)   | 78 (75, 81) |
| Diabetes, complicated             |                    |                      |                         |                        |             |
| No                                | 6,872,668 (87.21%) | 6.46 (6.09, 6.84)    | 35.86 (34.97, 36.77)    | 29.40 (28.43, 30.37)   | 82 (81, 83) |
| Yes                               | 1,008,282 (12.79%) | 20.31 (18.61, 22.16) | 94.09 (90.47, 97.85)    | 73.78 (69.70, 77.87)   | 79 (77, 81) |
| Hypertension, complicated         |                    |                      |                         |                        |             |
| No                                | 7,112,705 (90.25%) | 6.16 (5.80, 6.53)    | 36.20 (35.32, 37.09)    | 30.01 (29.08, 31.00)   | 83 (82, 84) |
| Yes                               | 768,245 (9.75%)    | 26.86 (24.66, 29.25) | 109.58 (105.11, 114.24) | 82.72 (77.62, 87.83)   | 76 (73, 78) |
| Hypertension, uncomplicated       |                    |                      |                         |                        |             |
| No                                | 4,278,042 (54.28%) | 8.47 (7.93, 9.03)    | 41.15 (39.95, 42.38)    | 32.68 (31.34, 34.02)   | 79 (78, 81) |
| Yes                               | 3,602,908 (45.72%) | 7.88 (7.32, 8.48)    | 46.70 (45.32, 48.13)    | 38.83 (37.31, 40.34)   | 83 (82, 84) |
| Liver disease, moderate to severe |                    |                      |                         |                        |             |
| No                                | 7,858,514 (99.72%) | 8.09 (7.70, 8.50)    | 43.46 (42.55, 44.39)    | 35.37 (34.37, 36.38)   | 81 (80, 82) |
| Yes                               | 22,436 (0.28%)     | 36.31 (24.90, 52.95) | 127.42 (101.14, 160.53) | 91.11 (58.65, 123.60)  | 74 (60, 83) |
| Other neurological disorders      |                    |                      |                         |                        |             |

|                                   |                    |                      |                         |                         |             |
|-----------------------------------|--------------------|----------------------|-------------------------|-------------------------|-------------|
| No                                | 7,724,657 (98.02%) | 7.76 (7.38, 8.16)    | 42.15 (41.25, 43.08)    | 34.39 (33.39, 35.38)    | 82 (81, 83) |
| Yes                               | 156,293 (1.98%)    | 29.75 (24.82, 35.66) | 111.38 (101.98, 121.65) | 81.63 (70.43, 92.84)    | 72 (66, 77) |
| <b>Renal failure, severe</b>      |                    |                      |                         |                         |             |
| No                                | 7,732,380 (98.11%) | 7.17 (6.80, 7.56)    | 41.06 (40.17, 41.98)    | 33.89 (32.92, 34.87)    | 81 (80, 82) |
| Yes                               | 148,570 (1.89%)    | 56.92 (50.07, 64.72) | 180.02 (166.95, 194.11) | 123.10 (107.71, 138.51) | 74 (60, 83) |
| <b>Peptic ulcer with bleeding</b> |                    |                      |                         |                         |             |
| No                                | 7,840,474 (99.49%) | 8.11 (7.73, 8.52)    | 43.49 (42.58, 44.42)    | 35.38 (34.37, 36.38)    | 81 (80, 82) |
| Yes                               | 40,476 (0.51%)     | 23.81 (16.09, 35.23) | 83.55 (67.80, 102.97)   | 59.75 (39.95, 79.54)    | 73 (59, 83) |
| <b>Valvular disease</b>           |                    |                      |                         |                         |             |
| No                                | 7,337,313 (93.10%) | 7.59 (7.20, 8.00)    | 40.84 (39.93, 41.77)    | 33.25 (32.24, 34.25)    | 81 (80, 82) |
| Yes                               | 543,637 (6.90%)    | 16.00 (14.05, 18.21) | 82.79 (78.07, 87.79)    | 66.79 (61.51, 72.07)    | 80 (78, 83) |
| <b>Weight loss</b>                |                    |                      |                         |                         |             |
| No                                | 7,714,023 (97.88%) | 7.83 (7.45, 8.24)    | 42.74 (41.83, 43.67)    | 34.91 (33.91, 35.91)    | 82 (81, 83) |
| Yes                               | 166,927 (2.12%)    | 24.64 (20.37, 29.80) | 84.61 (76.57, 93.50)    | 59.98 (50.31, 69.64)    | 72 (65, 77) |

<sup>a</sup>Only characteristics for which there was a significant interaction with receipt of booster in the analyses in **Table 2** are presented. This is similar to **Table 3**, but in **Table 3** we combined some comorbidities for simplicity of presentation.

<sup>b</sup>Booster vaccine effectiveness was computed as  $(1 - HR) \times 100$ .

**Supplemental Table 2.** Unadjusted COVID-19 hospitalization rate, adjusted hazard of hospitalization, and vaccine effectiveness for boosted enrollees vs non-boosted controls, by interval between primary vaccine and booster dose. The Target trial method was used for derivation of the cohorts.

| Months between primary vaccine and booster dose | Booster   | Patients, N (%), N=7,880,650 | Hospitalized individuals, N | Rate of hospitalization, per 1,000,000 person-day | Adjusted HR (95% CI) <sup>a</sup> | Booster vaccine effectiveness, percent (95% CI) <sup>b</sup> |
|-------------------------------------------------|-----------|------------------------------|-----------------------------|---------------------------------------------------|-----------------------------------|--------------------------------------------------------------|
| 4 to <5 months                                  | Unboosted | 28,006 (0.36%)               | 116                         | 44.26 (36.89, 53.09)                              | Ref                               | Ref                                                          |
|                                                 | Boosted   | 28,006 (0.36%)               | 69                          | 26.23 (20.72, 33.21)                              | 0.42 (0.32, 0.59)                 | 58 (41, 68)                                                  |
| 5 to <6 months                                  | Unboosted | 116,174 (1.47%)              | 341                         | 37.49 (33.72, 41.69)                              | Ref                               | Ref                                                          |
|                                                 | Boosted   | 116,174 (1.47%)              | 156                         | 17.08 (14.60, 19.99)                              | 0.38 (0.32, 0.47)                 | 62 (53, 68)                                                  |
| 6 to <7 months                                  | Unboosted | 882,501 (11.20%)             | 2,150                       | 42.67 (40.90, 44.51)                              | Ref                               | Ref                                                          |
|                                                 | Boosted   | 882,501 (11.28%)             | 379                         | 7.48 (6.77, 8.28)                                 | 0.17 (0.15, 0.19)                 | 83 (81, 85)                                                  |
| 7 to <8 months                                  | Unboosted | 1,648,115 (20.91%)           | 3,327                       | 41.97 (40.56, 43.42)                              | Ref                               | Ref                                                          |
|                                                 | Boosted   | 1,648,115 (20.91%)           | 482                         | 6.05 (5.53, 6.62)                                 | 0.15 (0.14, 0.17)                 | 85 (83, 86)                                                  |
| 8 to <9 months                                  | Unboosted | 1,102,838 (13.99%)           | 2,314                       | 46.93 (45.06, 48.88)                              | Ref                               | Ref                                                          |
|                                                 | Boosted   | 1,102,838 (13.99%)           | 418                         | 8.43 (7.66, 9.28)                                 | 0.19 (0.17, 0.21)                 | 81 (79, 83)                                                  |
| ≥9 months                                       | Unboosted | 162,841 (2.07%)              | 389                         | 56.13 (50.82, 61.99)                              | Ref                               | Ref                                                          |
|                                                 | Boosted   | 162,841 (2.07%)              | 124                         | 17.79 (14.92, 21.21)                              | 0.32 (0.26, 0.39)                 | 68 (61, 74)                                                  |

<sup>a</sup>Adjusted for individual's age, gender, race, Medicaid status, the type of booster and original vaccination type, prior COVID-19 infection, residence and 38 comorbidities.

<sup>b</sup>Vaccine effectiveness was computed as  $(1 - HR) * 10$ .



**Supplemental Table 3.** Characteristics of the study cohort derived using traditional matching method.

|                                  | All<br>N (%) <sup>a</sup> | Boosted<br>All patients, N (%) <sup>b</sup><br>N=2,276,784 | Non-Boosted<br>All patients, N (%) <sup>b</sup><br>N=2,276,784 | Standardized Difference |
|----------------------------------|---------------------------|------------------------------------------------------------|----------------------------------------------------------------|-------------------------|
| Follow up time                   |                           |                                                            |                                                                | 0.0426                  |
| Median (p25 p75)                 | 64 (50, 81)               | 64 (51, 81)                                                | 63 (50, 80)                                                    |                         |
| Min, Max                         | [10, 141]                 | [10,141]                                                   | [10,141]                                                       |                         |
| Age, year                        |                           |                                                            |                                                                | -0.0217                 |
| Median (p25 p75)                 | 74 (69, 81)               | 74 (69, 80)                                                | 75 (70, 81)                                                    |                         |
| COVID-19 vaccine original        |                           |                                                            |                                                                | 0                       |
| Pfizer                           | 2,255,330 (49.53%)        | 1,127,665 (50.00%)                                         | 1,127,665 (50.00%)                                             |                         |
| Moderna                          | 2,298,238 (50.47%)        | 1,149,119 (50.00%)                                         | 1,149,119 (50.00%)                                             |                         |
| Age                              |                           |                                                            |                                                                | 0                       |
| 66-70                            | 1,457,106 (32.00%)        | 833,171 (57.18%)                                           | 623,935 (42.82%)                                               |                         |
| 71-75                            | 1,137,888 (24.99%)        | 544,691 (47.87%)                                           | 593,197 (52.13%)                                               |                         |
| 76-80                            | 815,910 (17.92%)          | 385,640 (47.27%)                                           | 430,270 (52.73%)                                               |                         |
| 81-85                            | 570,487 (12.53%)          | 264,980 (46.45%)                                           | 305,507 (53.55%)                                               |                         |
| 86+                              | 572,177 (12.57%)          | 248,302 (43.40%)                                           | 323,875 (56.60%)                                               |                         |
| Gender                           |                           |                                                            |                                                                | 0                       |
| Male                             | 1,856,786 (40.78%)        | 928,393 (50.00%)                                           | 928,393 (50.00%)                                               |                         |
| Female                           | 2,696,782 (59.22%)        | 1,348,391 (50.00%)                                         | 1,348,391 (50.00%)                                             |                         |
| Race                             |                           |                                                            |                                                                | 0                       |
| Non-Hispanic White               | 3,872,602 (85.05%)        | 1,936,301 (50.00%)                                         | 1,936,301 (50.00%)                                             |                         |
| Non-Hispanic Black               | 242,278 (5.32%)           | 121,139 (50.00%)                                           | 121,139 (50.00%)                                               |                         |
| Asian                            | 122,198 (2.68%)           | 61,099 (50.00%)                                            | 61,099 (50.00%)                                                |                         |
| Hispanic                         | 166,582 (3.66%)           | 83,291 (50.00%)                                            | 83,291 (50.00%)                                                |                         |
| Other                            | 149,908 (3.29%)           | 74,954 (50.00%)                                            | 74,954 (50.00%)                                                |                         |
| Medicaid eligibility             |                           |                                                            |                                                                | 0                       |
| No                               | 4,130,228 (90.70%)        | 2,065,114 (50.00%)                                         | 2,065,114 (50.00%)                                             |                         |
| Yes                              | 423,340 (9.30%)           | 211,670 (50.00%)                                           | 211,670 (50.00%)                                               |                         |
| Number of prior hospitalizations |                           |                                                            |                                                                | 0                       |
| 0                                | 3,961,834 (87.01%)        | 1,980,917 (50.00%)                                         | 1,980,917 (50.00%)                                             |                         |
| 1                                | 437,178 (9.60%)           | 218,589 (50.00%)                                           | 218,589 (50.00%)                                               |                         |
| 2 and above                      | 154,556 (3.39%)           | 77,278 (50.00%)                                            | 77,278 (50.00%)                                                |                         |
| Prior COVID-19                   |                           |                                                            |                                                                | 0                       |
| No                               | 4,189,400 (92.00%)        | 2,094,700 (50.00%)                                         | 2,094,700 (50.00%)                                             |                         |

|                                           |                    |                    |                    |         |
|-------------------------------------------|--------------------|--------------------|--------------------|---------|
| Yes                                       | 364,168 (8.00%)    | 182,084 (50.00%)   | 182,084 (50.00%)   |         |
| Residence prior to original vaccination   |                    |                    |                    | 0       |
| Community                                 | 4,441,404 (97.54%) | 2,220,702 (50.00%) | 2,220,702 (50.00%) |         |
| Nursing facility                          | 112,164 (2.46%)    | 56,082 (50.00%)    | 56,082 (50.00%)    |         |
| Comorbidity status                        |                    |                    |                    |         |
| AIDS/HIV                                  | 6,127 (0.13%)      | 3,724 (60.75%)     | 2,406 (39.25%)     | 0.0158  |
| Alcohol abuse                             | 36,469 (0.80%)     | 17,858 (48.97%)    | 18,611 (51.03%)    | -0.0037 |
| Deficiency anemia                         | 528,747 (11.61%)   | 257,183 (48.64%)   | 271,564 (51.36%)   | -0.0197 |
| Auto immune                               | 189,550 (4.16%)    | 100,400 (52.97%)   | 89,150 (47.03%)    | 0.0247  |
| Blood loss anemia                         | 38,733 (0.85%)     | 18,993 (49.04%)    | 19,740 (50.96%)    | -0.0036 |
| Leukemia                                  | 29,637 (0.65%)     | 16,526 (55.76%)    | 13,111 (44.24%)    | 0.0187  |
| Lymphoma                                  | 49,913 (1.10%)     | 27,918 (55.93%)    | 21,995 (44.07%)    | 0.0250  |
| Metastatic cancer                         | 54,302 (1.19%)     | 28,665 (52.79%)    | 25,637 (47.21%)    | 0.0123  |
| Solid tumor without metastasis, malignant | 367,393 (8.07%)    | 243,472 (66.27%)   | 196,355 (33.73%)   | 0.0408  |
| Solid tumor without metastasis, in situ   | 34,597 (0.76%)     | 18,172 (52.52%)    | 16,425 (47.48%)    | 0.0088  |
| Cerebrovascular disease                   | 282,310 (6.20%)    | 135,314 (47.93%)   | 146,996 (52.07%)   | -0.0213 |
| Congestive heart failure                  | 356,103 (7.82%)    | 166,736 (46.82%)   | 189,367 (53.18%)   | -0.0370 |
| Coagulopathy                              | 115,730 (2.54%)    | 60,266 (52.07%)    | 55,464 (47.93%)    | 0.0134  |
| Dementia                                  | 280,135 (6.15%)    | 112,532 (40.17%)   | 167,603 (59.83%)   | -0.1008 |
| Depression                                | 459,883 (10.10%)   | 220,016 (47.84%)   | 239,867 (52.16%)   | -0.0289 |
| Diabetes, complicated                     | 622,866 (13.68%)   | 299,712 (48.12%)   | 323,154 (51.88%)   | -0.0300 |
| Diabetes, uncomplicated                   | 395,136 (8.68%)    | 194,142 (49.13%)   | 200,994 (50.87%)   | -0.0107 |
| Drug abuse                                | 30,671 (0.67%)     | 14,263 (46.50%)    | 16,408 (53.50%)    | -0.0115 |
| Hypertension, complicated                 | 490,506 (10.77%)   | 237,135 (48.34%)   | 253,371 (51.66%)   | -0.0230 |
| Hypertension, uncomplicated               | 2,084,461 (45.78%) | 1,034,099 (49.61%) | 1,050,362 (50.39%) | -0.0143 |
| Liver disease, mild                       | 101,027 (2.22%)    | 53,429 (52.89%)    | 47,598 (47.11%)    | 0.0174  |
| Liver disease, moderate to severe         | 15,217 (0.33%)     | 8,133 (53.45%)     | 7,084 (46.55%)     | 0.0080  |
| Chronic pulmonary disease                 | 538,917 (11.84%)   | 265,124 (49.20%)   | 273,793 (50.80%)   | -0.0118 |
| Neurological disorders affecting movement | 128,287 (2.82%)    | 59,645 (46.49%)    | 68,642 (53.51%)    | -0.0239 |
| Seizures and epilepsy                     | 70,887 (1.56%)     | 33,614 (47.42%)    | 37,273 (52.58%)    | -0.0130 |
| Other neurological disorders              | 111,769 (2.45%)    | 52,395 (46.88%)    | 59,374 (53.12%)    | -0.0198 |

|                               |                  |                  |                  |         |
|-------------------------------|------------------|------------------|------------------|---------|
| Obesity                       | 515,693 (11.33%) | 259,505 (50.32%) | 256,188 (49.68%) | 0.0046  |
| Paralysis                     | 65,254 (1.43%)   | 29,718 (45.54%)  | 35,536 (54.46%)  | -0.0215 |
| Peripheral vascular disease   | 501,662 (11.02%) | 243,727 (48.58%) | 257,935 (51.42%) | -0.0199 |
| Psychoses                     | 147,591 (3.24%)  | 71,737 (48.61%)  | 75,854 (51.39%)  | -0.0102 |
| Pulmonary circulation disease | 79,484 (1.75%)   | 38,948 (49.00%)  | 40,536 (51.00%)  | -0.0053 |
| Renal failure, moderate       | 410,262 (9.01%)  | 196,878 (47.99%) | 213,384 (52.01%) | -0.0253 |
| Renal failure, severe         | 98,053 (2.15%)   | 49,313 (50.29%)  | 48,740 (49.71%)  | 0.0017  |
| Hypothyroidism                | 745,029 (16.36%) | 369,655 (49.62%) | 375,374 (50.38%) | -0.0068 |
| Other thyroid disorders       | 129,354 (2.84%)  | 68,142 (52.68%)  | 61,212 (47.32%)  | 0.0183  |
| Peptic ulcer with bleeding    | 25,912 (0.57%)   | 12,763 (49.26%)  | 13,149 (50.74%)  | -0.0023 |
| Valvular disease              | 318,354 (6.99%)  | 159,361 (50.06%) | 158,993 (49.94%) | 0.0006  |
| Weight loss                   | 117,125 (2.57%)  | 55,600 (47.47%)  | 61,525 (52.53%)  | -0.0164 |

<sup>a</sup>Column percents are presented.

<sup>b</sup>Row percents are presented.

**Supplemental Table 4.** Unadjusted COVID-19 hospitalization rates and adjusted hazards of hospitalization from a Cox proportional hazards regression model including booster and all patient characteristics: sensitivity analysis results for the study cohort derived using the traditional matching method.

|                                  | All<br>N (%)       | Hospitalization rate per 1,000,000<br>person day | Adjusted HR<br>(95% CI) |
|----------------------------------|--------------------|--------------------------------------------------|-------------------------|
| COVID-19 vaccine original        |                    |                                                  |                         |
| Pfizer                           | 2,255,330 (49.53%) | 49.71 (48.57, 50.87)                             | Ref                     |
| Moderna                          | 2,298,238 (50.47%) | 38.60 (37.48, 39.76)                             | 0.82 (0.79, 0.86)       |
| Booster                          |                    |                                                  |                         |
| No                               | 2,276,784 (50.00%) | 11.58 (11.01, 12.17)                             | Ref                     |
| Yes                              | 2,276,784 (50.00%) | 78.65 (77.13, 80.20)                             | 0.16 (0.15, 0.16)       |
| Age                              |                    |                                                  |                         |
| 66-70                            | 1,457,106 (32.00%) | 21.22 (20.25, 22.24)                             | Ref                     |
| 71-75                            | 1,137,888 (24.99%) | 35.27 (33.86, 36.74)                             | 1.32 (1.24, 1.40)       |
| 76-80                            | 815,910 (17.92%)   | 53.15 (51.10, 55.27)                             | 1.80 (1.69, 1.92)       |
| 81-85                            | 570,487 (12.53%)   | 71.03 (68.19, 74.06)                             | 2.32 (2.17, 2.47)       |
| 86+                              | 572,177 (12.57%)   | 87.10 (83.90, 90.42)                             | 2.91 (2.73, 3.11)       |
| Gender                           |                    |                                                  |                         |
| Male                             | 1,856,786 (40.78%) | 53.62 (52.24, 55.03)                             | Ref                     |
| Female                           | 2,696,782 (59.22%) | 38.67 (37.70, 39.68)                             | 0.71 (0.68, 0.74)       |
| Race                             |                    |                                                  |                         |
| Non-Hispanic White               | 3,872,602 (85.05%) | 46.28 (45.39, 47.19)                             | Ref                     |
| Non-Hispanic Black               | 242,278 (5.32%)    | 45.01 (41.53, 48.78)                             | 0.82 (0.75, 0.89)       |
| Asian                            | 122,198 (2.68%)    | 20.80 (17.64, 24.52)                             | 0.41 (0.35, 0.48)       |
| Hispanic                         | 166,582 (3.66%)    | 38.23 (34.42, 42.46)                             | 0.74 (0.66, 0.83)       |
| Other                            | 149,908 (3.29%)    | 33.31 (29.10, 37.34)                             | 0.91 (0.81, 1.02)       |
| Medicaid eligibility             |                    |                                                  |                         |
| No                               | 4,130,228 (90.70%) | 43.12 (42.29, 43.96)                             | Ref                     |
| Yes                              | 423,340 (9.30%)    | 62.76 (59.57, 66.13)                             | 1.41 (1.33, 1.50)       |
| Number of prior hospitalizations |                    |                                                  |                         |
| 0                                | 3,961,834 (87.01%) | 36.97 (36.18, 37.77)                             | Ref                     |
| 1                                | 437,178 (9.60%)    | 80.51 (77.08, 84.08)                             | 1.11 (1.04, 1.17)       |
| 2 and above                      | 154,556 (3.39%)    | 140.07 (132.57, 147.99)                          | 1.17 (1.08, 1.27)       |
| Prior COVID-19                   |                    |                                                  |                         |
| No                               | 4,189,400 (92.00%) | 46.07 (45.21, 46.94)                             | Ref                     |
| Yes                              | 364,168 (8.00%)    | 30.08 (27.78, 32.56)                             | 0.38 (0.34, 0.41)       |

|                                           |                    |                         |                   |
|-------------------------------------------|--------------------|-------------------------|-------------------|
| Residence prior to original vaccination   |                    |                         |                   |
| Community                                 | 4,441,404 (97.54%) | 44.90 (44.08, 45.73)    | Ref               |
| Nursing facility                          | 112,164 (2.46%)    | 41.59 (36.78, 47.03)    | 0.49 (0.43, 0.56) |
| Comorbidity status                        |                    |                         |                   |
| AIDS/HIV                                  | 6,127 (0.13%)      | 29.20 (16.59, 51.42)    | 0.78 (0.44, 1.37) |
| Alcohol abuse                             | 36,469 (0.80%)     | 65.01 (54.91, 76.95)    | 0.88 (0.74, 1.04) |
| Deficiency anemia                         | 528,747 (11.61%)   | 102.13 (98.60, 105.79)  | 1.19 (1.13, 1.25) |
| Auto immune                               | 189,550 (4.16%)    | 80.23 (75.27, 85.52)    | 1.72 (1.61, 1.84) |
| Blood loss anemia                         | 38,733 (0.85%)     | 123.57 (109.84, 139.01) | 1.11 (0.98, 1.25) |
| Leukemia                                  | 29,637 (0.65%)     | 146.14 (130.28, 163.93) | 2.53 (2.25, 2.85) |
| Lymphoma                                  | 49,913 (1.10%)     | 106.77 (96.22, 118.47)  | 1.88 (1.69, 2.10) |
| Metastatic cancer                         | 54,302 (1.19%)     | 73.47 (65.04, 82.98)    | 1.36 (1.20, 1.54) |
| Solid tumor without metastasis, malignant | 367,393 (8.07%)    | 55.95 (52.92, 59.16)    | 1.03 (0.97, 1.10) |
| Solid tumor without metastasis, in situ   | 34,597 (0.76%)     | 56.48 (47.09, 67.76)    | 1.08 (0.90, 1.29) |
| Cerebrovascular disease                   | 282,310 (6.20%)    | 81.05 (76.78, 85.55)    | 0.98 (0.92, 1.05) |
| Congestive heart failure                  | 356,103 (7.82%)    | 131.44 (126.55, 136.54) | 1.37 (1.30, 1.45) |
| Coagulopathy                              | 115,730 (2.54%)    | 116.76 (108.99, 125.08) | 1.21 (1.12, 1.31) |
| Dementia                                  | 280,135 (6.15%)    | 93.40 (88.72, 98.33)    | 1.21 (1.14, 1.29) |
| Depression                                | 459,883 (10.10%)   | 71.56 (68.40, 74.88)    | 1.07 (1.02, 1.13) |
| Diabetes, complicated                     | 622,866 (13.68%)   | 98.17 (94.95, 101.49)   | 1.65 (1.57, 1.73) |
| Diabetes, uncomplicated                   | 395,136 (8.68%)    | 51.30 (48.41, 54.37)    | 1.37 (1.28, 1.46) |
| Drug abuse                                | 30,671 (0.67%)     | 78.88 (66.72, 93.26)    | 1.06 (0.90, 1.26) |
| Hypertension, complicated                 | 490,506 (10.77%)   | 113.45 (109.57, 117.46) | 1.16 (1.08, 1.25) |
| Hypertension, uncomplicated               | 2,084,461 (45.78%) | 47.02 (45.81, 48.27)    | 1.22 (1.17, 1.28) |
| Liver disease, mild                       | 101,027 (2.22%)    | 69.86 (63.45, 76.92)    | 1.17 (1.06, 1.29) |
| Liver disease, moderate to severe         | 15,217 (0.33%)     | 125.06 (105.02, 148.91) | 1.78 (1.49, 2.13) |
| Chronic pulmonary disease                 | 538,917 (11.84%)   | 93.55 (90.20, 97.01)    | 1.57 (1.50, 1.64) |
| Neurological disorders affecting movement | 128,287 (2.82%)    | 82.04 (75.75, 88.85)    | 1.15 (1.06, 1.25) |
| Seizures and epilepsy                     | 70,887 (1.56%)     | 90.79 (81.93, 100.62)   | 1.34 (1.20, 1.50) |
| Other neurological disorders              | 111,769 (2.45%)    | 111.42 (103.57, 119.87) | 1.07 (0.98, 1.17) |
| Obesity                                   | 515,693 (11.33%)   | 76.49 (73.38, 79.72)    | 1.28 (1.22, 1.34) |
| Paralysis                                 | 65,254 (1.43%)     | 94.37 (84.93, 104.85)   | 1.11 (0.98, 1.25) |
| Peripheral vascular disease               | 501,662 (11.02%)   | 90.86 (87.44, 94.41)    | 1.23 (1.17, 1.29) |

|                               |                  |                         |                   |
|-------------------------------|------------------|-------------------------|-------------------|
| Psychoses                     | 147,591 (3.24%)  | 72.76 (67.19, 78.79)    | 1.26 (1.15, 1.37) |
| Pulmonary circulation disease | 79,484 (1.75%)   | 144.67 (134.05, 156.12) | 1.23 (1.13, 1.34) |
| Renal failure, moderate       | 410,262 (9.01%)  | 97.40 (93.49, 101.47)   | 1.34 (1.27, 1.42) |
| Renal failure, severe         | 98,053 (2.15%)   | 192.37 (181.30, 204.12) | 2.35 (2.18, 2.54) |
| Hypothyroidism                | 745,029 (16.36%) | 58.64 (56.39, 60.98)    | 1.00 (0.96, 1.05) |
| Other thyroid disorders       | 129,354 (2.84%)  | 50.79 (45.95, 56.15)    | 1.01 (0.91, 1.12) |
| Peptic ulcer with bleeding    | 25,912 (0.57%)   | 87.75 (73.94, 104.14)   | 0.88 (0.74, 1.05) |
| Valvular disease              | 318,354 (6.99%)  | 84.09 (80.00, 88.38)    | 0.95 (0.90, 1.01) |
| Weight loss                   | 117,125 (2.57%)  | 86.56 (79.61, 93.68)    | 0.92 (0.84, 1.01) |

---

**Supplemental Table 5.** Unadjusted COVID-19 hospitalization rates and adjusted hazards of hospitalization from a Cox proportional hazards regression model including booster and all patient characteristics: sensitivity analysis restricting the outcome to those with an admitting diagnosis of COVID-19 and excluding individuals with prior COVID-19 infection in the study cohort derived using target trial method.

|                                         | All<br>N (%)       | Hospitalization rate<br>1,000,000 per person day | Adjusted HR<br>(95% CI) |
|-----------------------------------------|--------------------|--------------------------------------------------|-------------------------|
| All                                     | 7,398,502 (100%)   |                                                  |                         |
| COVID-19 vaccine original               |                    |                                                  |                         |
| Pfizer                                  | 3,742,898 (50.59%) | 14.56 (14.04, 15.09)                             | Ref                     |
| Moderna                                 | 3,655,604 (49.41%) | 10.05 (9.58, 10.55)                              | 0.79 (0.74, 0.84)       |
| Booster                                 |                    |                                                  |                         |
| No                                      | 3,699,251 (50.00%) | 3.65 (3.39, 3.94)                                | Ref                     |
| Yes                                     | 3,699,251 (50.00%) | 21.47 (20.82, 22.15)                             | 0.17 (0.16, 0.19)       |
| Age                                     |                    |                                                  |                         |
| 66-70                                   | 2,132,749 (28.83%) | 6.78 (6.30, 7.29)                                | Ref                     |
| 71-75                                   | 2,052,429 (27.74%) | 9.46 (8.88, 10.07)                               | 1.26 (1.15, 1.39)       |
| 76-80                                   | 1,435,494 (19.40%) | 14.20 (13.36, 15.10)                             | 1.72 (1.56, 1.89)       |
| 81-85                                   | 938,186 (12.68%)   | 18.80 (17.60, 20.09)                             | 2.19 (1.97, 2.42)       |
| 86+                                     | 839,644 (11.35%)   | 24.82 (23.35, 26.37)                             | 2.96 (2.68, 3.28)       |
| Gender                                  |                    |                                                  |                         |
| Male                                    | 3,093,166 (41.81%) | 15.13 (14.53, 15.75)                             | Ref                     |
| Female                                  | 4,605,336 (62.25%) | 10.66 (10.24, 11.11)                             | 0.70 (0.66, 0.74)       |
| Race                                    |                    |                                                  |                         |
| Non-Hispanic White                      | 6,391,306 (86.39%) | 13.04 (12.65, 13.44)                             | Ref                     |
| Non-Hispanic Black                      | 311,520 (4.21%)    | 10.50 (9.01, 12.24)                              | 0.65 (0.56, 0.77)       |
| Asian                                   | 217,552 (2.94%)    | 4.97 (3.80, 6.51)                                | 0.35 (0.26, 0.46)       |
| Hispanic                                | 200,148 (2.71%)    | 11.97 (10.04, 14.29)                             | 0.77 (0.64, 0.92)       |
| Other                                   | 277,976 (3.76%)    | 9.67 (8.18, 11.44)                               | 0.95 (0.80, 1.12)       |
| Medicaid eligibility                    |                    |                                                  |                         |
| No                                      | 6,987,528 (94.45%) | 11.97 (11.61, 12.34)                             | Ref                     |
| Yes                                     | 410,974 (5.55%)    | 22.18 (20.25, 24.30)                             | 1.64 (1.47, 1.82)       |
| Number of prior hospitalizations        |                    |                                                  |                         |
| 0                                       | 6,651,950 (89.91%) | 10.20 (9.86, 10.54)                              | Ref                     |
| 1                                       | 574,532 (7.77%)    | 27.57 (25.75, 29.52)                             | 1.25 (1.14, 1.45)       |
| 2 and above                             | 172,020 (2.33%)    | 48.41 (44.12, 53.11)                             | 1.27 (1.11, 1.45)       |
| Residence prior to original vaccination |                    |                                                  |                         |
| Community                               | 7,339,662 (99.20%) | 12.45 (12.09, 12.81)                             | Ref                     |

|                                           |                    |                      |                   |
|-------------------------------------------|--------------------|----------------------|-------------------|
| Nursing facility                          | 58,840 (0.80%)     | 23.75 (18.97, 29.74) | 0.60 (0.47, 0.76) |
| Comorbidity status                        |                    |                      |                   |
| AIDS/HIV                                  | 8,075 (0.11%)      | 10.65 (4.43, 25.59)  | 0.91 (0.38, 2.20) |
| Alcohol abuse                             | 47,924 (0.65%)     | 18.93 (14.22, 25.19) | 0.81 (0.60, 1.08) |
| Deficiency anemia                         | 716,872 (9.69%)    | 29.74 (28.04, 31.54) | 1.07 (0.99, 1.16) |
| Auto immune                               | 294,373 (3.98%)    | 23.89 (21.60, 26.42) | 1.78 (1.60, 1.98) |
| Blood loss anemia                         | 54,261 (0.73%)     | 36.44 (30.04, 44.20) | 1.12 (0.91, 1.37) |
| Leukemia                                  | 46,467 (0.63%)     | 50.08 (42.25, 59.35) | 3.02 (2.53, 3.61) |
| Lymphoma                                  | 78,740 (1.06%)     | 35.06 (29.97, 41.01) | 2.14 (1.81, 2.52) |
| Metastatic cancer                         | 80,524 (1.09%)     | 18.87 (15.28, 23.31) | 1.15 (0.93, 1.43) |
| Solid tumor without metastasis, malignant | 601,510 (8.13%)    | 15.89 (14.56, 17.35) | 1.02 (0.93, 1.12) |
| Solid tumor without metastasis, in situ   | 61,710 (0.83%)     | 15.89 (12.04, 20.96) | 1.08 (0.82, 1.43) |
| Cerebrovascular disease                   | 395,484 (5.35%)    | 24.15 (22.11, 26.37) | 0.97 (0.88, 1.08) |
| Congestive heart failure                  | 467,231 (6.32%)    | 41.32 (38.83, 43.95) | 1.34 (1.22, 1.46) |
| Coagulopathy                              | 157,710 (2.13%)    | 34.41 (30.67, 38.60) | 1.14 (1.01, 1.30) |
| Dementia                                  | 286,208 (3.87%)    | 33.98 (31.16, 37.06) | 1.29 (1.17, 1.44) |
| Depression                                | 597,266 (8.07%)    | 23.39 (21.74, 25.16) | 1.13 (1.03, 1.23) |
| Diabetes, complicated                     | 911,464 (12.32%)   | 29.21 (27.70, 30.81) | 1.68 (1.56, 1.81) |
| Diabetes, uncomplicated                   | 619,206 (8.37%)    | 14.67 (13.38, 16.08) | 1.38 (1.25, 1.53) |
| Drug abuse                                | 40,788 (0.55%)     | 19.76 (15.69, 24.90) | 0.94 (0.70, 1.26) |
| Hypertension, complicated                 | 671,223 (9.07%)    | 35.26 (33.34, 37.29) | 1.14 (1.02, 1.28) |
| Hypertension, uncomplicated               | 3,354,447 (45.34%) | 13.18 (12.64, 13.74) | 1.17 (1.09, 1.26) |
| Liver disease, mild                       | 147,417 (1.99%)    | 23.02 (19.87, 26.68) | 1.29 (1.04, 1.50) |
| Liver disease, moderate to severe         | 20,147 (0.27%)     | 60.38 (54.60, 66.38) | 1.25 (0.87, 1.78) |
| Chronic pulmonary disease                 | 764,601 (10.33%)   | 30.05 (28.39, 31.80) | 1.74 (1.62, 1.87) |
| Neurological disorders affecting movement | 181,527 (2.45%)    | 25.71 (22.66, 29.17) | 1.20 (1.05, 1.37) |
| Seizures and epilepsy                     | 83,949 (1.13%)     | 30.92 (26.12, 36.60) | 1.40 (1.17, 1.67) |
| Other neurological disorders              | 119,002 (1.61%)    | 37.99 (33.49, 43.09) | 1.03 (0.89, 1.19) |
| Obesity                                   | 767,200 (10.37%)   | 24.24 (22.74, 25.84) | 1.39 (1.29, 1.51) |
| Paralysis                                 | 67,927 (0.92%)     | 32.91 (27.48, 39.42) | 1.09 (0.89, 1.33) |
| Peripheral vascular disease               | 712,834 (9.63%)    | 26.44 (24.83, 28.16) | 1.17 (1.08, 1.26) |
| Psychoses                                 | 176,832 (2.39%)    | 23.57 (20.62, 26.94) | 1.23 (1.06, 1.42) |
| Pulmonary circulation disease             | 109,683 (1.48%)    | 48.05 (42.69, 54.09) | 1.37 (1.20, 1.56) |
| Renal failure, moderate                   | 610,559 (8.25%)    | 28.54 (26.73, 30.47) | 1.35 (1.24, 1.47) |
| Renal failure, severe                     | 131,115 (1.77%)    | 60.31 (54.80, 66.38) | 2.52 (2.23, 2.84) |



|                            |                    |                      |                   |
|----------------------------|--------------------|----------------------|-------------------|
| Hypothyroidism             | 1,147,787 (15.51%) | 17.30 (16.27, 18.40) | 1.05 (0.97, 1.13) |
| Other thyroid disorders    | 207,976 (2.81%)    | 13.17 (11.15, 15.55) | 0.92 (0.77, 1.09) |
| Peptic ulcer with bleeding | 37,979 (0.51%)     | 24.78 (18.50, 33.19) | 0.83 (0.62, 1.12) |
| Valvular disease           | 498,420 (6.74%)    | 23.49 (21.68, 25.45) | 0.92 (0.84, 1.02) |
| Weight loss                | 129,999 (1.76%)    | 28.36 (24.65, 32.64) | 0.92 (0.79, 1.07) |

---

**Supplemental Table 6.** Unadjusted COVID-19 hospitalization rates and adjusted hazards of hospitalization from a Cox proportional hazards regression models including booster and all patient characteristics: sensitivity analysis restricting the outcome to those with an admitting diagnosis of COVID-19 and excluding individuals with prior COVID-19 infection in the study cohort derived using the traditional matching method.

|                                         | All<br>N (%)       | Hospitalization rate per 1,000,000<br>person day | Adjusted HR<br>(95% CI) |
|-----------------------------------------|--------------------|--------------------------------------------------|-------------------------|
| COVID-19 vaccine original               |                    |                                                  |                         |
| Pfizer                                  | 2,038,992 (48.67%) | 24.91 (24.07, 25.78)                             | Ref                     |
| Moderna                                 | 2,150,408 (51.33%) | 18.91 (24.07, 25.78)                             | 0.79 (0.75, 0.84)       |
| Booster                                 |                    |                                                  |                         |
| No                                      | 2,094,700 (50.00%) | 4.94 (4.56, 5.36)                                | Ref                     |
| Yes                                     | 2,094,700 (50.00%) | 39.69 (38.58, 40.85)                             | 0.13 (0.12, 0.14)       |
| Age                                     |                    |                                                  |                         |
| 66-70                                   | 1,364,894 (32.58%) | 10.38 (9.68, 11.12)                              | Ref                     |
| 71-75                                   | 1,055,430 (25.19%) | 17.46 (16.44, 18.54)                             | 1.32 (1.20, 1.44)       |
| 76-80                                   | 750,146 (17.91%)   | 26.25 (24.77, 27.82)                             | 1.80 (1.64, 1.97)       |
| 81-85                                   | 518,226 (12.37%)   | 36.70 (34.58, 38.96)                             | 2.41 (2.19, 2.65)       |
| 86+                                     | 500,704 (11.95%)   | 43.74 (41.34, 46.27)                             | 2.89 (2.62, 2.65)       |
| Gender                                  |                    |                                                  |                         |
| Male                                    | 1,717,182 (40.99%) | 27.19 (26.18, 28.23)                             | Ref                     |
| Female                                  | 2,472,218 (59.01%) | 18.65 (17.95, 19.38)                             | 0.67 (0.63, 0.71)       |
| Race                                    |                    |                                                  |                         |
| Non-Hispanic White                      | 3,557,572 (84.92%) | 23.12 (22.47, 23.79)                             | Ref                     |
| Non-Hispanic Black                      | 221,522 (5.29%)    | 17.50 (15.29, 20.02)                             | 0.64 (0.55, 0.73)       |
| Asian                                   | 117,260 (2.80%)    | 10.39 (8.19, 13.18)                              | 0.41 (0.33, 0.53)       |
| Hispanic                                | 151,226 (3.61%)    | 19.58 (16.78, 22.84)                             | 0.75 (0.64, 0.88)       |
| Other                                   | 141,820 (3.39%)    | 17.70 (15.07, 20.80)                             | 0.97 (0.82, 1.14)       |
| Medicaid                                |                    |                                                  |                         |
| No                                      | 3,839,076 (91.64%) | 21.23 (20.63, 21.84)                             | Ref                     |
| Yes                                     | 350,324 (8.36%)    | 33.47 (30.93, 36.21)                             | 1.47 (1.34, 1.61)       |
| Number of prior hospitalizations        |                    |                                                  |                         |
| 0                                       | 3,715,352 (88.68%) | 18.13 (17.56, 18.71)                             | Ref                     |
| 1                                       | 357,842 (8.54%)    | 45.14 (42.35, 48.11)                             | 1.20 (1.11, 1.31)       |
| 2 and above                             | 116,206 (2.77%)    | 76.32 (70.08, 83.11)                             | 1.22 (1.08, 1.37)       |
| Residence prior to original vaccination |                    |                                                  |                         |
| Community                               | 4,138,566 (98.79%) | 22.02 (21.43, 22.63)                             | Ref                     |
| Nursing facility                        | 50,834 (1.21%)     | 35.57 (29.21, 43.31)                             | 0.66 (0.53, 0.81)       |

| Comorbidity status                        |                    |                        |                   |
|-------------------------------------------|--------------------|------------------------|-------------------|
| AIDS/HIV                                  | 5,508 (0.13%)      | 18.84 (8.98, 39.52)    | 1.08 (0.51, 2.27) |
| Alcohol abuse                             | 30,737 (0.73%)     | 31.82 (24.49, 41.35)   | 0.85 (0.65, 1.11) |
| Deficiency anemia                         | 438,785 (10.47%)   | 50.94 (48.24, 53.79)   | 1.07 (0.99, 1.15) |
| Auto immune                               | 169,397 (4.04%)    | 41.35 (37.65, 45.42)   | 1.81 (1.64, 2.00) |
| Blood loss anemia                         | 33,001 (0.79%)     | 61.32 (51.20, 73.44)   | 1.09 (0.91, 1.32) |
| Leukemia                                  | 26,751 (0.64%)     | 84.45 (72.07, 98.95)   | 2.96 (2.51, 3.49) |
| Lymphoma                                  | 45,213 (1.08%)     | 59.81 (51.70, 69.19)   | 2.16 (1.85, 2.52) |
| Metastatic cancer                         | 49,796 (1.19%)     | 32.97 (27.28, 39.85)   | 1.22 (1.01, 1.49) |
| Solid tumor without metastasis, malignant | 336,268 (8.03%)    | 27.19 (25.02, 29.55)   | 1.01 (0.92, 1.10) |
| Solid tumor without metastasis, in situ   | 31,914 (0.76%)     | 29.50 (22.70, 38.33)   | 1.12 (0.86, 1.46) |
| Cerebrovascular disease                   | 237,178 (5.66%)    | 40.71 (37.46, 44.23)   | 0.93 (0.84, 1.03) |
| Congestive heart failure                  | 294,785 (7.04%)    | 70.19 (66.31, 74.30)   | 1.37 (1.26, 1.49) |
| Coagulopathy                              | 95,771 (2.29%)     | 58.39 (52.50, 64.93)   | 1.16 (1.03, 1.30) |
| Dementia                                  | 196,140 (4.68%)    | 53.79 (49.63, 58.31)   | 1.18 (1.07, 1.30) |
| Depression                                | 36,485 (8.80%)     | 37.54 (35.03, 40.24)   | 1.06 (0.97, 1.14) |
| Diabetes, complicated                     | 546,407 (13.04%)   | 51.27 (48.82, 53.85)   | 1.74 (1.62, 1.86) |
| Diabetes, uncomplicated                   | 358,661 (8.56%)    | 26.54 (24.39, 28.88)   | 1.44 (1.31, 1.58) |
| Drug abuse                                | 26,901 (0.64%)     | 42.54 (33.36, 54.24)   | 1.15 (0.90, 1.48) |
| Hypertension, complicated                 | 413,015 (9.86%)    | 58.84 (55.83, 61.99)   | 1.11 (0.99, 1.23) |
| Hypertension, uncomplicated               | 1,896,475 (45.27%) | 23.58 (22.69, 24.52)   | 1.19 (1.11, 1.28) |
| Liver disease, mild                       | 89,531 (2.14%)     | 34.37 (29.72, 39.74)   | 1.14 (0.98, 1.33) |
| Liver disease, moderate to severe         | 13,301 (0.32%)     | 48.14 (35.70, 64.91)   | 1.37 (1.01, 1.86) |
| Chronic pulmonary disease                 | 463,784 (11.07%)   | 49.87 (47.27, 52.61)   | 1.66 (1.55, 1.77) |
| Neurological disorders affecting movement | 107,375 (2.56%)    | 44.39 (39.45, 49.95)   | 1.20 (1.06, 1.35) |
| Seizures and epilepsy                     | 54,628 (1.30%)     | 45.09 (38.23, 53.18)   | 1.23 (1.03, 1.46) |
| Other neurological disorders              | 80,505 (1.92%)     | 62.89 (56.14, 70.45)   | 1.10 (0.96, 1.25) |
| Obesity                                   | 455,572 (10.87%)   | 40.65 (38.27, 43.17)   | 1.35 (1.26, 1.46) |
| Paralysis                                 | 47,108 (1.12%)     | 54.77 (46.60, 64.38)   | 1.16 (0.97, 1.39) |
| Peripheral vascular disease               | 421,410 (10.06%)   | 46.95 (44.30, 49.75)   | 1.21 (1.12, 1.29) |
| Psychoses                                 | 112,883 (2.69%)    | 37.13 (32.71, 42.15)   | 1.17 (1.02, 1.34) |
| Pulmonary circulation disease             | 68,108 (1.63%)     | 78.33 (70.07, 87.57)   | 1.30 (1.15, 1.47) |
| Renal failure, moderate                   | 358,276 (8.55%)    | 48.57 (45.67, 51.67)   | 1.31 (1.21, 1.42) |
| Renal failure, severe                     | 83,961 (2.00%)     | 101.61 (93.07, 110.92) | 2.51 (2.24, 2.86) |
| Hypothyroidism                            | 660,296 (15.76%)   | 30.64 (28.93, 32.45)   | 1.06 (0.99, 1.14) |

|                            |                 |                      |                   |
|----------------------------|-----------------|----------------------|-------------------|
| Other thyroid disorders    | 117,446 (2.80%) | 24.10 (20.69, 28.07) | 0.97 (0.83, 1.13) |
| Peptic ulcer with bleeding | 21,601 (0.52%)  | 45.42 (35.04, 58.89) | 0.90 (0.69, 1.18) |
| Valvular disease           | 284,109 (6.78%) | 42.55 (39.51, 45.81) | 0.96 (0.88, 1.05) |
| Weight loss                | 86,086 (2.05%)  | 46.48 (40.88, 52.84) | 0.91 (0.79, 1.04) |

---

**Supplemental Table 7.** Unadjusted COVID-19 hospitalization rates, adjusted hazards of hospitalization and vaccine effectiveness for booster vs non-booster, by interval between primary vaccine and booster dose in the study cohort derived using traditional matching method.

| Months between primary vaccine and booster dose | Booster   | Patients, N (%), N=4,553,568 | Hospitalized individuals, N | Rate of hospitalization, per 1,000,000 person-day | Adjusted HR (95% CI) <sup>a</sup> | Booster vaccine effectiveness, percent (95% CI) <sup>b</sup> |
|-------------------------------------------------|-----------|------------------------------|-----------------------------|---------------------------------------------------|-----------------------------------|--------------------------------------------------------------|
| 4 to <5 months                                  | Unboosted | 22,910 (0.50%) <sup>c</sup>  | 197                         | 82.23 (71.51, 95.55)                              | Ref                               | Ref                                                          |
|                                                 | Boosted   | 22,910 (0.50%)               | 90                          | 36.37 (29.58, 44.72)                              | 0.32 (0.25, 0.42)                 | 68 (58, 75)                                                  |
| 5 to <6 months                                  | Unboosted | 65,528 (1.44%)               | 607                         | 96.34 (88.97, 104.31)                             | Ref                               | Ref                                                          |
|                                                 | Boosted   | 65,528 (1.44%)               | 179                         | 27.14 (23.44, 31.42)                              | 0.24 (0.21, 0.29)                 | 76 (71, 79)                                                  |
| 6 to <7 months                                  | Unboosted | 558,943 (12.27%)             | 3,131                       | 84.40 (81.50, 87.41)                              | Ref                               | Ref                                                          |
|                                                 | Boosted   | 558,943 (12.27%)             | 411                         | 10.84 (9.84, 11.94)                               | 0.14 (0.12, 0.15)                 | 86 (85, 88)                                                  |
| 7 to <8 months                                  | Unboosted | 874,273 (19.20%)             | 3,596                       | 74.49 (72.09, 76.96)                              | Ref                               | Ref                                                          |
|                                                 | Boosted   | 874,273 (19.20%)             | 421                         | 8.60 (7.82, 9.46)                                 | 0.13 (0.12, 0.14)                 | 87 (86, 88)                                                  |
| 8 to <9 months                                  | Unboosted | 611,391 (13.43%)             | 2,153                       | 74.22 (71.15, 77.42)                              | Ref                               | Ref                                                          |
|                                                 | Boosted   | 611,391 (13.43%)             | 303                         | 10.32 (9.22, 11.55)                               | 0.15 (0.13, 0.17)                 | 85 (83, 87)                                                  |
| ≥9 months                                       | Unboosted | 143,739 (3.16%)              | 404                         | 77.84 (70.61, 85.81)                              | Ref                               | Ref                                                          |
|                                                 | Boosted   | 143,739 (3.16%)              | 107                         | 20.44 (16.91, 24.70)                              | 0.27 (0.22, 0.34)                 | 73 (66, 78)                                                  |

<sup>a</sup>Adjusted for individual's age, gender, race, Medicaid status, the type of booster and original vaccination type, prior COVID-19 infection, residence and 38 comorbidities.

<sup>b</sup>Vaccine effectiveness was computed as  $(1 - HR) * 10$ .

<sup>c</sup>Column percent.

**Supplemental Table 8.** Association of interval between original vaccination and booster with risk of hospitalization for COVID-19: adjusted hazards ratio from a fully adjusted Cox proportional hazards regression model in the study cohort derived using the traditional matching method.

|                                                              | Adjusted HR<br>(95% CI) |
|--------------------------------------------------------------|-------------------------|
| Months between primary vaccine and booster dose <sup>a</sup> |                         |
| 4 to <5 months                                               | 1.21 (0.91, 1.61)       |
| 5 to <6 months                                               | Ref                     |
| 6 to <7 months                                               | 0.82 (0.67, 0.99)       |
| 7 to <8 months                                               | 0.88 (0.72, 1.07)       |
| 8 to <9 months                                               | 1.18 (0.96, 1.44)       |
| >=9 months                                                   | 1.90 (1.46, 2.49)       |
| Age                                                          |                         |
| 66-70                                                        | Ref                     |
| 71-75                                                        | 1.16 (0.99, 1.35)       |
| 76-80                                                        | 1.35 (1.14, 1.59)       |
| 81-85                                                        | 1.85 (1.56, 2.19)       |
| 86+                                                          | 2.38 (2.01, 2.83)       |
| Gender                                                       |                         |
| Male                                                         | Ref                     |
| Female                                                       | 0.66 (0.60, 0.74)       |
| Race                                                         |                         |
| Non-Hispanic White                                           | Ref                     |
| Non-Hispanic Black                                           | 1.01 (0.81, 1.24)       |
| Asian                                                        | 0.46 (0.30, 0.70)       |
| Hispanic                                                     | 1.06 (0.81, 1.38)       |
| Other                                                        | 0.87 (0.64, 1.18)       |
| Medicaid eligibility                                         |                         |
| No                                                           | Ref                     |
| Yes                                                          | 1.50 (1.27, 1.77)       |
| Booster and Original Vaccination <sup>a</sup>                |                         |
| Homologous:                                                  |                         |
| Pfizer-Pfizer                                                | Ref                     |
| Moderna-Moderna                                              | 0.71 (0.63, 0.79)       |
| Heterologous:                                                |                         |
| Pfizer-Moderna                                               | 1.22 (0.99, 1.35)       |
| Moderna-Pfizer                                               | 0.82 (0.54, 1.23)       |
| Number of prior hospitalizations                             |                         |
| 0                                                            | Ref                     |
| 1                                                            | 1.38 (1.19, 1.59)       |
| 2 and above                                                  | 1.43 (1.17, 1.74)       |
| Prior COVID-19 infection                                     |                         |
| No                                                           | Ref                     |
| Yes                                                          | 0.51 (0.41, 0.63)       |
| Residence                                                    |                         |
| Community                                                    | Ref                     |
| Nursing facility                                             | 0.63 (0.47, 0.86)       |
| Comorbidity <sup>b</sup>                                     |                         |
| AIDS/HIV                                                     | 0.74 (0.24, 2.29)       |

|                                           |                   |
|-------------------------------------------|-------------------|
| Alcohol abuse                             | 0.87 (0.55, 1.37) |
| Deficiency anemia                         | 1.17 (1.03, 1.33) |
| Auto immune disease                       | 2.34 (2.02, 2.72) |
| Blood loss anemia                         | 0.95 (0.69, 1.31) |
| Leukemia                                  | 4.13 (3.36, 5.08) |
| Lymphoma                                  | 3.21 (2.66, 3.86) |
| Metastatic cancer                         | 1.60 (1.24, 2.08) |
| Solid tumor without metastasis            | 1.07 (0.93, 1.24) |
| Solid tumor in situ                       | 1.44 (0.99, 2.10) |
| Cerebrovascular disease                   | 0.92 (0.78, 1.10) |
| Congestive heart failure                  | 1.12 (0.97, 1.31) |
| Coagulopathy                              | 1.19 (0.99, 1.42) |
| Dementia                                  | 1.43 (1.20, 1.71) |
| Depression                                | 1.10 (0.95, 1.27) |
| Diabetes, complicated                     | 1.67 (1.48, 1.89) |
| Diabetes, uncomplicated                   | 1.27 (1.06, 1.52) |
| Drug abuse                                | 0.73 (0.42, 1.27) |
| Hypertension, complicated                 | 1.22 (1.01, 1.48) |
| Hypertension, uncomplicated               | 1.14 (1.01, 1.30) |
| Liver disease, mild                       | 1.32 (1.05, 1.66) |
| Liver disease, moderate to severe         | 1.79 (1.21, 2.65) |
| Chronic pulmonary disease                 | 1.60 (1.42, 1.80) |
| Neurological disorders affecting movement | 1.20 (0.96, 1.50) |
| Seizures and epilepsy                     | 1.28 (0.95, 1.71) |
| Other neurological disorders              | 1.13 (0.91, 1.40) |
| Obesity                                   | 1.12 (0.98, 1.29) |
| Paralysis                                 | 0.98 (0.70, 1.37) |
| Peripheral vascular disease               | 1.30 (1.15, 1.47) |
| Psychoses                                 | 1.25 (0.99, 1.57) |
| Pulmonary circulation disease             | 1.24 (0.99, 1.55) |
| Renal failure, moderate                   | 1.50 (1.29, 1.73) |
| Renal failure, severe                     | 3.34 (2.79, 4.01) |
| Hypothyroidism                            | 1.03 (0.91, 1.16) |
| Other thyroid disorders                   | 0.87 (0.66, 1.15) |
| Peptic ulcer with bleeding                | 1.02 (0.68, 1.53) |
| Valvular disease                          | 0.88 (0.75, 1.03) |
| Weight loss                               | 0.96 (0.78, 1.19) |

<sup>a</sup>In this analysis the hospitalization rates for boosted enrollees are compared across different intervals between original vaccination and booster. In the other analyses of booster effectiveness by interval (**Figure 1, eTable 2, eTable 8**), hospitalization rates for boosted individuals were compared to non-boosted controls within each time interval.

## REFERENCES

---

- <sup>1</sup> CMS Data Files. [https://resdac.org/cms-data?tid\\_1%5B1%5D=1](https://resdac.org/cms-data?tid_1%5B1%5D=1). Accessed March 21, 2022.
- <sup>2</sup> Dickerman BA, Gerlovin H, Madenci AL, et al. Comparative Effectiveness of BNT162b2 and mRNA-1273 Vaccines in U.S. Veterans. *N Engl J Med*. 2022;386(2):105-115. doi:10.1056/NEJMoa2115463
- <sup>3</sup> Barda N, Dagan N, Cohen C, et al. Effectiveness of a third dose of the BNT162b2 mRNA COVID-19 vaccine for preventing severe outcomes in Israel: an observational study. *Lancet*. 2021;398(10316):2093-2100. doi:10.1016/S0140-6736(21)02249-2
- <sup>4</sup> Dagan N, Barda N, Kepten E, et al. BNT162b2 mRNA Covid-19 Vaccine in a Nationwide Mass Vaccination Setting. *N Engl J Med*. 2021;384(15):1412-1423. doi:10.1056/NEJMoa2101765
- <sup>5</sup> Hernán MA, Sauer BC, Hernández-Díaz S, Platt R, Shrier I. Specifying a target trial prevents immortal time bias and other self-inflicted injuries in observational analyses. *J Clin Epidemiol*. 2016;79:70-75. doi:10.1016/j.jclinepi.2016.04.014
- <sup>6</sup> Hernán MA, Robins JM. Using Big Data to Emulate a Target Trial When a Randomized Trial Is Not Available. *Am J Epidemiol*. 2016;183(8):758-764. doi:10.1093/aje/kwv254
- <sup>7</sup> Dickerman BA, García-Albéniz X, Logan RW, Denaxas S, Hernán MA. Avoidable flaws in observational analyses: an application to statins and cancer. *Nat Med*. 2019;25(10):1601-1606. doi:10.1038/s41591-019-0597-x
- <sup>8</sup> Hernán MA. Methods of Public Health Research - Strengthening Causal Inference from Observational Data. *N Engl J Med*. 2021;385(15):1345-1348. doi:10.1056/NEJMp2113319
- <sup>9</sup> Bar-On YM, Goldberg Y, Mandel M, et al. Protection against Covid-19 by BNT162b2 Booster across Age Groups. *N Engl J Med*. 2021;385(26):2421-2430. doi:10.1056/NEJMoa2115926
- <sup>10</sup> Arbel R, Hammerman A, Sergienko R, et al. BNT162b2 Vaccine Booster and Mortality Due to Covid-19. *N Engl J Med*. 2021;385(26):2413-2420. doi:10.1056/NEJMoa2115624
- <sup>11</sup> Goodwin, James S., Shuang Li, Jie Zhou, James E. Graham, Amol Karmarkar, and Kenneth Ottenbacher. "Comparison of methods to identify long term care nursing home residence with administrative data." *BMC health services research* 17, no. 1 (2017): 1-8.
- <sup>12</sup> Mehta, H.B., Li, S. and Goodwin, J.S., 2021. Risk factors associated with SARS-CoV-2 infections, hospitalization, and mortality among US nursing home residents. *JAMA network open*, 4(3), pp.e216315-e216315.
- <sup>13</sup> Elixhauser Comorbidity Software Refined for ICD-10-CM. [https://www.hcup-us.ahrq.gov/toolsoftware/comorbidityicd10/comorbidity\\_icd10.jsp](https://www.hcup-us.ahrq.gov/toolsoftware/comorbidityicd10/comorbidity_icd10.jsp). Accessed March 21, 2022.
- <sup>14</sup> Klabunde CN, Potosky AL, Legler JM, Warren JL. Development of a comorbidity index using physician claims data. *J Clin Epidemiol*. 2000;53(12):1258-1267. doi:10.1016/s0895-4356(00)00256-0
- <sup>15</sup> Klein, J.P. and Moeschberger, M.L. (2003) *Survival analysis: Techniques for censored and truncated data*. 2nd Edition, Springer, New York.
- <sup>16</sup> COVID-19 Vaccinations in the United States. [https://covid.cdc.gov/covid-data-tracker/#vaccinations\\_vacc-people-onedose-pop-5yr](https://covid.cdc.gov/covid-data-tracker/#vaccinations_vacc-people-onedose-pop-5yr). Accessed March 24, 2022.
- <sup>17</sup> Is a patient hospitalized ‘with’ covid or ‘for’ covid? It can be hard to tell. <https://www.washingtonpost.com/outlook/2022/01/07/hospitalization-covid-statistics-incidental/>. Accessed March 28, 2022.
